# Supplementary material for: Association of Glutathione Peroxidase 3 (GPx3) and miR-196a with Carbohydrate Metabolism Disorders in the Elderly
Source: MDPI journal article supplement (doi:10.3390/ijms25105409), 2024-05-15
Supplement: s1 [file s1]

**Table S1.** (a) Correlations between the level of GPx3 and miR-196a, anthropometric parameters, SBP and DBP in patients aged 65 and older from the control group (n=38), CMD (n=88), prediabetes (n=37) and T2DM (n= 51). (b) Correlations between the level of GPx3 and metabolic and renal parameters in patients aged 65 and older from the control group (n=38), with the CMD (n=88), with the prediabetes (n=37) and with T2DM (n=51).

| (a)                                |                   |              |               |              |                       |              |                |   |              |
|------------------------------------|-------------------|--------------|---------------|--------------|-----------------------|--------------|----------------|---|--------------|
|                                    | Control<br>(n=38) |              | CMD<br>(n=88) |              | Prediabetes<br>(n=37) |              | T2DM<br>(n=51) |   |              |
| Parameters                         | Rho               | P            | Rho           | P            | Rho                   | P            | Rho            | P |              |
| miR-196a                           | 0.212             | 0.202        | 0.174         | 0.110        | 0.163                 | 0.349        | 0.113          |   | 0.430        |
| Age [years]                        | -0.249            | 0.132        | -0.009        | 0.937        | 0.011                 | 0.947        | -0.043         |   | 0.765        |
| SBP (mmHg)                         | -0.274            | 0.096        | -0.147        | 0.175        | 0.207                 | 0.225        | <b>-0.350</b>  |   | <b>0.012</b> |
| DBP (mmHg)                         | <b>-0.321</b>     | <b>0.049</b> | -0.046        | 0.673        | 0.201                 | 0.240        | -0.241         |   | 0.088        |
| Body mass [kg]                     | 0.051             | 0.762        | -0.208        | 0.053        | -0.263                | 0.121        | -0.191         |   | 0.179        |
| Height [m]                         | 0.240             | 0.146        | -0.191        | 0.076        | -0.212                | 0.215        | -0.191         |   | 0.181        |
| BMI [kg/m <sup>2</sup> ]           | -0.187            | 0.261        | -0.122        | 0.265        | -0.123                | 0.475        | -0.102         |   | 0.479        |
| WC [cm]                            | 0.026             | 0.879        | -0.133        | 0.220        | -0.216                | 0.205        | -0.083         |   | 0.559        |
| HC [cm]                            | -0.122            | 0.466        | -0.020        | 0.854        | -0.071                | 0.681        | 0.017          |   | 0.908        |
| WHR                                | 0.316             | 0.053        | -0.151        | 0.164        | 0.015                 | 0.929        | -0.235         |   | 0.097        |
| ST triceps (mm)                    | <b>-0.400</b>     | <b>0.013</b> | -0.008        | 0.943        | -0.029                | 0.866        | 0.047          |   | 0.744        |
| ST abdominal (mm)                  | -0.092            | 0.584        | -0.078        | 0.471        | -0.107                | 0.535        | -0.019         |   | 0.897        |
| ST thigh (mm)                      | -0.163            | 0.329        | -0.062        | 0.568        | -0.144                | 0.402        | 0.066          |   | 0.644        |
| Visceral Fat Rating                | -0.149            | 0.371        | -0.121        | 0.275        | -0.182                | 0.295        | -0.072         |   | 0.620        |
| BIA – BF [%]                       | -0.213            | 0.199        | 0.086         | 0.439        | -0.011                | 0.950        | 0.226          |   | 0.115        |
| BIA - BF [kg]                      | -0.094            | 0.573        | <b>-0.255</b> | <b>0.019</b> | -0.099                | 0.572        | 0.040          |   | 0.784        |
| BIA - FFM [%]                      | 0.218             | 0.188        | -0.005        | 0.966        | 0.007                 | 0.969        | -0.266         |   | 0.062        |
| BIA - FFM [kg]                     | 0.184             | 0.268        | <b>-0.234</b> | <b>0.031</b> | -0.213                | 0.220        | -0.264         |   | 0.064        |
| BIA-TBW [%]                        | 0.304             | 0.063        | -0.149        | 0.172        | -0.089                | 0.612        | <b>-0.283</b>  |   | <b>0.046</b> |
| BIA-TBW [kg]                       | 0.217             | 0.191        | <b>-0.302</b> | <b>0.006</b> | -0.273                | 0.113        | -0.228         |   | 0.111        |
| (b)                                |                   |              |               |              |                       |              |                |   |              |
|                                    | Control<br>(n=38) |              | CMD<br>(n=88) |              | Prediabetes<br>(n=37) |              | T2DM<br>(n=51) |   |              |
| Parameters                         | Rho               | P            | Rho           | P            | Rho                   | P            | Rho            | P |              |
| HbA1c [%]                          | 0.090             | 0.593        | -0.119        | 0.273        | 0.074                 | 0.668        | -0.161         |   | 0.259        |
| FPG [mmol/l]                       | 0.095             | 0.572        | <b>-0.291</b> | <b>0.006</b> | <b>-0.427</b>         | <b>0.009</b> | -0.177         |   | 0.215        |
| HOMA-IR                            | -0.011            | 0.947        | 0.110         | 0.309        | -0.129                | 0.452        | 0.157          |   | 0.271        |
| TG/ HDL ratio                      | -0.020            | 0.907        | 0.154         | 0.158        | <b>0.337</b>          | <b>0.044</b> | 0.138          |   | 0.344        |
| Creatinine [μmol/L]                | <b>-0.470</b>     | <b>0.003</b> | -0.095        | 0.383        | 0.079                 | 0.646        | -0.228         |   | 0.112        |
| Urea [mmol/L]                      | -0.229            | 0.166        | -0.211        | 0.051        | -0.219                | 0.199        | -0.174         |   | 0.227        |
| eGFR [ml/min/1.73 m <sup>2</sup> ] | <b>0.380</b>      | <b>0.019</b> | 0.007         | 0.950        | -0.079                | 0.646        | 0.047          |   | 0.747        |
| LDL [mmol/L]                       | 0.230             | 0.164        | 0.023         | 0.834        | -0.032                | 0.855        | 0.091          |   | 0.536        |
| HDL [mmol/L]                       | -0.073            | 0.661        | -0.117        | 0.283        | <b>-0.377</b>         | <b>0.023</b> | -0.043         |   | 0.768        |
| TG [mmol/L]                        | -0.026            | 0.875        | 0.123         | 0.258        | 0.228                 | 0.181        | 0.155          |   | 0.282        |
| T-CH [mmol/L]                      | 0.208             | 0.210        | 0.013         | 0.903        | -0.147                | 0.391        | 0.099          |   | 0.496        |

List of abbreviations: T2DM—type 2 diabetic, BMI—body mass index, WHR—waist to hip ratio, WC—waist circumference, HC – hip circumference, ST -skinfold thickness , BIA- bioelectrical impedance analysis, BF-body fat, FFM- free fat mass- muscle mass,

TBW – total body water. Rho - Spearman's rank correlation coefficient. Statistically significant results are shown in bold. HbA1c—glycated hemoglobin FPG—fasting plasma glucose, HOMA-IR—homeostasis model assessment for insulin resistance, eGFR—estimated glomerular filtration rate, T-CH—total cholesterol, LDL-C—low-density lipoprotein cholesterol, HDL-C—high-density lipoprotein cholesterol, TG—triglycerides. Rho - Spearman's rank correlation coefficient. Statistically significant results are shown in bold.

**Table S2. (a).** Correlations between the level of miR-196a expression and anthropometric parameters, SBP and DBP in patients from the control group (n=38), CMD(n=88), prediabetes (n=37) and T2DM (n =51). **(b)** Correlations between the level of miR-196a expression and metabolic parameters in patients from the control group (n=38), CMD(n=88), prediabetes (n=37) and T2DM (n =51).

| (a)                                |                   |              |               |              |                       |              |                |       |
|------------------------------------|-------------------|--------------|---------------|--------------|-----------------------|--------------|----------------|-------|
|                                    | Control<br>(n=38) |              | CMD<br>(n=88) |              | Prediabetes<br>(n=37) |              | T2DM<br>(n=51) |       |
| Parameters                         | Rho               | P            | Rho           | P            | Rho                   | P            | Rho            | P     |
| Age [years]                        | 0.294             | 0.073        | -0.141        | 0.191        | -0.054                | 0.751        | -0.164         | 0.249 |
| SBP (mmHg)                         | -0.001            | 0.98         | -0.049        | 0.649        | -0.108                | 0.528        | -0.017         | 0.904 |
| DBP (mmHg)                         | -0.033            | 0.843        | -0.041        | 0.702        | -0.08                 | 0.642        | 0.005          | 0.973 |
| Body mass [kg]                     | -0.056            | 0.736        | 0.021         | 0.848        | -0.036                | 0.832        | -0.006         | 0.967 |
| Height [m]                         | -0.092            | 0.579        | -0.036        | 0.737        | -0.051                | 0.769        | -0.055         | 0.7   |
| BMI [kg/m <sup>2</sup> ]           | 0.104             | 0.532        | 0.078         | 0.474        | -0.013                | 0.935        | 0.065          | 0.654 |
| WC [cm]                            | -0.024            | 0.884        | -0.008        | 0.938        | -0.131                | 0.443        | -0.018         | 0.896 |
| HC [cm]                            | 0.111             | 0.506        | -0.052        | 0.627        | -0.239                | 0.16         | 0.046          | 0.745 |
| WHR                                | -0.046            | 0.782        | 0.007         | 0.946        | 0.027                 | 0.875        | -0.085         | 0.55  |
| ST triceps (mm)                    | 0.293             | 0.074        | -0.016        | 0.877        | -0.186                | 0.275        | 0.071          | 0.621 |
| ST abdominal (mm)                  | -0.037            | 0.822        | 0.076         | 0.485        | -0.043                | 0.803        | 0.043          | 0.765 |
| ST thigh (mm)                      | 0.137             | 0.412        | 0.119         | 0.271        | 0.053                 | 0.757        | 0.099          | 0.486 |
| Visceral Fat Rating                | 0.113             | 0.498        | -0.0162       | 0.884        | -0.004                | 0.984        | -0.124         | 0.389 |
| BIA – BF [%]                       | 0.141             | 0.398        | 0.071         | 0.521        | 0.189                 | 0.277        | -0.120         | 0.408 |
| BIA - BF [kg]                      | 0.087             | 0.603        | <b>0.251</b>  | <b>0.021</b> | 0.099                 | 0.571        | -0.065         | 0.649 |
| BIA - FFM [%]                      | -0.178            | 0.284        | -0.155        | 0.157        | -0.181                | 0.297        | 0.14           | 0.331 |
| BIA - FFM [kg]                     | -0.11             | 0.511        | -0.02         | 0.855        | -0.164                | 0.344        | 0.058          | 0.688 |
| BIA-TBW [%]                        | -0.212            | 0.202        | -0.043        | 0.692        | -0.112                | 0.520        | 0.121          | 0.402 |
| BIA-TBW [kg]                       | -0.172            | 0.3          | 0.191         | 0.084        | -0.118                | 0.498        | 0.071          | 0.625 |
| (b)                                |                   |              |               |              |                       |              |                |       |
|                                    | Control<br>(n=38) |              | CMD<br>(n=88) |              | Prediabetes<br>(n=37) |              | T2DM<br>(n=51) |       |
| Parameters                         | Rho               | P            | Rho           | P            | Rho                   | P            | Rho            | P     |
| HbA1c [%]                          | -0.164            | 0.324        | 0.057         | 0.598        | -0.157                | 0.361        | 0.016          | 0.910 |
| FPG [mmol/l]                       | -0.008            | 0.959        | -0.054        | 0.613        | <b>-0.336</b>         | <b>0.045</b> | -0.091         | 0.527 |
| HOMA-IR                            | 0.120             | 0.472        | -0.045        | 0.677        | -0.203                | 0.236        | 0.098          | 0.493 |
| TG/ HDL ratio                      | -0.243            | 0.140        | -0.083        | 0.449        | 0.009                 | 0.956        | -0.201         | 0.166 |
| Creatinine [μmol/L]                | 0.239             | 0.148        | 0.026         | 0.809        | -0.051                | 0.764        | 0.083          | 0.562 |
| Urea [mmol/L]                      | 0.165             | 0.321        | -0.081        | 0.457        | -0.003                | 0.985        | -0.127         | 0.377 |
| eGFR [ml/min/1.73 m <sup>2</sup> ] | -0.139            | 0.404        | -0.079        | 0.467        | -0.061                | 0.722        | -0.118         | 0.413 |
| LDL [mmol/L]                       | <b>-0.499</b>     | <b>0.001</b> | 0.075         | 0.494        | 0.079                 | 0.644        | 0.093          | 0.523 |

|               |               |              |        |       |       |       |        |       |
|---------------|---------------|--------------|--------|-------|-------|-------|--------|-------|
| HDL [mmol/L]  | 0.109         | 0.515        | 0.084  | 0.438 | 0.133 | 0.440 | 0.121  | 0.400 |
| TG [mmol/L]   | -0.273        | 0.096        | -0.024 | 0.823 | 0.180 | 0.291 | -0.174 | 0.225 |
| T-CH [mmol/L] | <b>-0.406</b> | <b>0.011</b> | 0.039  | 0.715 | 0.137 | 0.424 | 0.001  | 0.992 |

List of abbreviations: T2DM—type 2 diabetic, BMI—body mass index, WHR—waist to hip ratio, WC—waist circumference, HC—hip circumference, ST—skinfold thickness, BIA—bioelectrical impedance analysis, BF—body fat, FFM—free fat mass—muscle mass, TBW—total body water. Rho—Spearman's rank correlation coefficient. Statistically significant results are shown in bold. HbA1c—glycated hemoglobin FPG—fasting plasma glucose, HOMA-IR—homeostasis model assessment for insulin resistance, eGFR—estimated glomerular filtration rate, T-CH—total cholesterol, LDL-C—low-density lipoprotein cholesterol, HDL-C—high-density lipoprotein cholesterol, TG—triglycerides. Rho—Spearman's rank correlation coefficient. Statistically significant results are shown in bold.

**Table S3.** Spearman correlations and linear regression analysis of Gpx3 concentration and anthropometric and biochemical parameters in the entire study population (n = 126). Only the best Gpx3-related variables are shown, as assessed by the stepwise forward multiple regression method.

| Whole study population<br>(n=126) |               |              |                                      |              |
|-----------------------------------|---------------|--------------|--------------------------------------|--------------|
| Parameters                        | Rho           | P            | $\beta \pm SE$                       | P            |
| MiR196a                           | 0.165         | 0.067        |                                      |              |
| Age [years]                       | -0.128        | 0.155        |                                      |              |
| SBP (mmHg)                        | <b>-0.199</b> | <b>0.026</b> | <b>-0.190 <math>\pm</math> 0.089</b> | <b>0.037</b> |
| DBP (mmHg)                        | -0.130        | 0.147        |                                      |              |
| Body mass [kg]                    | -0.112        | 0.214        |                                      |              |
| Height [m]                        | -0.012        | 0.898        |                                      |              |
| BMI [kg/m <sup>2</sup> ]          | -0.143        | 0.114        |                                      |              |
| HbA1c [%]                         | <b>-0.187</b> | <b>0.037</b> | -0.011 $\pm$ 0.167                   | 0.948        |
| FPG[mmol/l]                       | <b>-0.249</b> | <b>0.005</b> | -0.188 $\pm$ 0.166                   | 0.262        |
| HOMA-IR                           | 0.115         | 0.200        |                                      |              |
| TG/ HDL ratio                     | 0.080         | 0.381        |                                      |              |
| Creatinine [ $\mu$ mol/L]         | <b>-0.200</b> | <b>0.026</b> | -0.133 $\pm$ 0.118                   | 0.261        |
| Urea [mmol/L]                     | <b>-0.242</b> | <b>0.007</b> | -0.024 $\pm$ 0.118                   | 0.842        |
| eGFR [ml.min.1,73m <sup>2</sup> ] | 0.156         | 0.083        |                                      |              |
| LDL [mmol/L]                      | 0.123         | 0.174        |                                      |              |
| HDL [mmol/L]                      | -0.074        | 0.412        |                                      |              |
| TG [mmol/L]                       | 0.070         | 0.468        |                                      |              |
| T-CH [mmol/L]                     | 0.092         | 0.309        |                                      |              |
| WC [cm]                           | -0.095        | 0.292        |                                      |              |
| HC [cm]                           | -0.044        | 0.630        |                                      |              |
| WHR                               | -0.030        | 0.744        |                                      |              |
| ST triceps (mm)                   | -0.140        | 0.119        |                                      |              |
| ST abdominal (mm)                 | -0.125        | 0.166        |                                      |              |
| ST thigh (mm)                     | -0.125        | 0.164        |                                      |              |
| Visceral Fat Rating               | -0.159        | 0.081        |                                      |              |
| BIA – BF [%]                      | -0.041        | 0.654        |                                      |              |
| BIA - BF [kg]                     | <b>-0.268</b> | <b>0.003</b> | 0.054 $\pm$ 0.091                    | 0.558        |
| BIA - FFM [%]                     | 0.135         | 0.137        |                                      |              |
| BIA - FFM [kg]                    | -0.036        | 0.696        |                                      |              |
| BIA-TBW [%]                       | 0.019         | 0.831        |                                      |              |
| BIA-TBW [kg]                      | -0.250        | 0.006        |                                      |              |

List of abbreviations :BMI—body mass index, DBP—diastolic blood pressure, eGFR—estimated glomerular filtration rate, HDL-CH—HDL cholesterol, FPG—fasting plasma glucose, HbA1c—glycated hemoglobin, HC—hips circumference, LDL-CH—LDL

cholesterol, FPG—fasting plasma glucose, SBP—systolic blood pressure, T-CH—total cholesterol, TG—triglycerides, WC- waist circumference, WHR—waist-hip ratio. ST -skinfold thickness , BIA- bioelectrical impedance analysis, BF-body fat, FFM- free fat mass- muscle mass, TBW – total body water. \*\* Rho—Spearman’s rank correlation coefficient. \*\*\* p-value.  $\beta \pm SE$  \*\*\*\*—regression coefficient  $\pm$  standard error. # variables were log-transformed prior to linear regression analysis The bolded results indicate statistically significant associations.
